# Supplementary material for: Social Inequalities in Breakfast Consumption among Adolescents in Spain: The DESKcohort Project
Source: MDPI journal article supplement (doi:10.3390/nu13082500), 2021-07-22
Supplement: s1 [file s1]

# Supplementary Material

**Table S1.** Prevalence ratios (PR) of having breakfast 3 or less times in the last week in 12-18-years-old adolescents from Central Catalonia, estimated using Poisson regression models.

|                                         | Girls       |                    |             |                    | Boys        |                    |             |                    |
|-----------------------------------------|-------------|--------------------|-------------|--------------------|-------------|--------------------|-------------|--------------------|
|                                         | Crude PR    |                    | Adjusted PR |                    | Crude PR    |                    | Adjusted PR |                    |
|                                         | PR          | 95%CI              | PR          | 95%CI              | PR          | 95%CI              | PR          | 95%CI              |
| <b>Perceived socioeconomic position</b> |             |                    |             |                    |             |                    |             |                    |
| Highest SEP tertile                     | 1.00        |                    | 1.00        |                    | 1.00        |                    | 1.00        |                    |
| Medium SEP tertile                      | <b>1.14</b> | <b>(1.02-1.29)</b> | 1.05        | (0.93-1.17)        | <b>1.24</b> | <b>(1.24-1.41)</b> | <b>1.13</b> | <b>(1.00-1.28)</b> |
| Lowest SEP tertile                      | <b>1.44</b> | <b>(1.29-1.60)</b> | <b>1.17</b> | <b>(1.06-1.30)</b> | <b>1.37</b> | <b>(1.37-1.55)</b> | 1.12        | (0.99-1.27)        |
| <b>Course</b>                           |             |                    |             |                    |             |                    |             |                    |
| 2nd course of CSE                       | 1.00        |                    | 1.00        |                    | 1.00        |                    | 1.00        |                    |
| 4th course of CSE                       | <b>1.22</b> | <b>(1.09-1.37)</b> | 1.11        | (0.99-1.24)        | <b>1.28</b> | <b>(1.28-1.46)</b> | <b>1.25</b> | <b>(1.09-1.43)</b> |
| 2nd course of PCSE                      | <b>1.27</b> | <b>(1.14-1.42)</b> | <b>1.15</b> | <b>(1.02-1.28)</b> | <b>1.38</b> | <b>(1.38-1.63)</b> | <b>1.36</b> | <b>(1.13-1.64)</b> |
| ILTC                                    | <b>1.61</b> | <b>(1.41-1.83)</b> | <b>1.32</b> | <b>(1.14-1.51)</b> | <b>1.89</b> | <b>(1.89-2.23)</b> | <b>1.72</b> | <b>(1.45-2.03)</b> |
| <b>Migratory status</b>                 |             |                    |             |                    |             |                    |             |                    |
| Native                                  | 1.00        |                    | 1.00        |                    | 1.00        |                    | 1.00        |                    |
| First- or second-generation immigrant   | <b>1.37</b> | <b>(1.26-1.49)</b> | <b>1.24</b> | <b>(1.15-1.33)</b> | <b>1.36</b> | <b>(1.36-1.55)</b> | <b>1.22</b> | <b>(1.08-1.38)</b> |
| No data                                 | <b>1.26</b> | <b>(1.09-1.47)</b> | 1.12        | (0.96-1.31)        | <b>1.08</b> | <b>(1.08-1.48)</b> | 0.97        | (0.72-1.32)        |
| <b>Size of municipality</b>             |             |                    |             |                    |             |                    |             |                    |
| ≤5,000 inhabitants                      | 1.00        |                    |             |                    | 1.00        |                    |             |                    |
| 5,001-20,000 inhabitants                | 1.07        | (0.95-1.20)        |             |                    | <b>1.16</b> | <b>(1.16-1.33)</b> |             |                    |
| >20,000 inhabitants                     | 1.06        | (0.93-1.22)        |             |                    | <b>1.01</b> | <b>(1.01-1.18)</b> |             |                    |
| Living outside Central Catalonia        | 1.01        | (0.76-1.33)        |             |                    | <b>1.79</b> | <b>(1.79-2.44)</b> |             |                    |
| <b>Academic performance</b>             |             |                    |             |                    |             |                    |             |                    |
| Good grades                             | 1.00        |                    | 1.00        |                    | 1.00        |                    | 1.00        |                    |
| Average grades                          | <b>1.56</b> | <b>(1.38-1.77)</b> | <b>1.40</b> | <b>(1.24-1.59)</b> | <b>1.53</b> | <b>(1.53-1.88)</b> | <b>1.44</b> | <b>(1.17-1.76)</b> |
| Poor grades                             | <b>2.16</b> | <b>(1.87-2.49)</b> | <b>1.71</b> | <b>(1.48-1.99)</b> | <b>1.99</b> | <b>(1.99-2.48)</b> | <b>1.74</b> | <b>(1.42-2.14)</b> |
| No data                                 | <b>1.94</b> | <b>(1.61-2.33)</b> | <b>1.64</b> | <b>(1.36-1.97)</b> | <b>1.80</b> | <b>(1.80-2.37)</b> | <b>1.58</b> | <b>(1.21-2.06)</b> |
| <b>General health status</b>            |             |                    |             |                    |             |                    |             |                    |
| Excellent or very good                  | 1.00        |                    | 1.00        |                    | 1.00        |                    | 1.00        |                    |
| Good, fair or poor                      | <b>1.65</b> | <b>(1.53-1.78)</b> | <b>1.38</b> | <b>(1.27-1.51)</b> | <b>1.48</b> | <b>(1.48-1.67)</b> | <b>1.22</b> | <b>(1.07-1.39)</b> |
| <b>Emotional state</b>                  |             |                    |             |                    |             |                    |             |                    |
| Highest tertile (better mood)           | 1.00        |                    | 1.00        |                    | 1.00        |                    | 1.00        |                    |
| Medium tertile                          | <b>1.28</b> | <b>(1.12-1.47)</b> | <b>1.19</b> | <b>(1.04-1.37)</b> | <b>1.20</b> | <b>(1.20-1.33)</b> | 1.08        | (0.96-1.21)        |
| Lowest tertile (worse mood)             | <b>1.69</b> | <b>(1.49-1.91)</b> | <b>1.39</b> | <b>(1.22-1.57)</b> | <b>1.52</b> | <b>(1.52-1.78)</b> | <b>1.23</b> | <b>(1.03-1.47)</b> |
| <b>Physical Activity</b>                |             |                    |             |                    |             |                    |             |                    |
| Over WHO recommendations                | 1.00        |                    |             |                    | 1.00        |                    | 1.00        |                    |
| Under WHO recommendations               | <b>1.26</b> | <b>(1.13-1.41)</b> |             |                    | <b>1.40</b> | <b>(1.40-1.56)</b> | <b>1.20</b> | <b>(1.07-1.36)</b> |
| No data                                 | <b>1.44</b> | <b>(1.24-1.68)</b> |             |                    | <b>1.39</b> | <b>(1.39-1.68)</b> | <b>1.26</b> | <b>(1.03-1.54)</b> |
| <b>Body Mass Index</b>                  |             |                    |             |                    |             |                    |             |                    |
| Normal weight                           | 1.00        |                    |             |                    | 1.00        |                    | 1.00        |                    |
| Underweight                             | 0.83        | (0.58-1.19)        |             |                    | 0.79        | (0.79-1.14)        | 0.76        | (0.53-1.10)        |
| Overweight or obesity                   | <b>1.27</b> | <b>(1.16-1.40)</b> |             |                    | <b>1.28</b> | <b>(1.28-1.46)</b> | <b>1.18</b> | <b>(1.03-1.35)</b> |
| No data                                 | 1.01        | (0.81-1.26)        |             |                    | <b>1.45</b> | <b>(1.45-1.88)</b> | 1.30        | (1.00-1.68)        |
| <b>On a diet</b>                        |             |                    |             |                    |             |                    |             |                    |
| No                                      | 1.00        |                    |             |                    | 1.00        |                    |             |                    |
| Yes, to lose or maintain weight         | 1.14        | (0.98-1.33)        |             |                    | <b>1.33</b> | <b>(1.33-1.63)</b> |             |                    |
| Yes, for other reasons                  | 0.91        | (0.74-1.13)        |             |                    | 0.79        | (0.79-1.08)        |             |                    |

Highlighted in bold the statistically significant associations. Abbreviations: CSE=compulsory secondary education (ISCED 2); PCSE=post-compulsory secondary education (ISCED3); ILTC=intermediate level training cycles; SEP=socioeconomic position.
